# Supplementary material for: The FluxEngine air-sea gas flux toolbox: simplified interface and extensions for in situ analyses and multiple sparingly soluble gases
Source: Copernicus journal article supplement (doi:10.5194/os-2019-45), 2019-05-15
Supplement: Supplementary file [file os-2019-45-AC1-supplement.pdf]

The referee's comments are shown below with our reply and action shown in **bold**. Quoted line numbers refer to the line numbers in the tracked changes document.

## Responses to Reviewer 1

### Reviewer general comments

My only minor comment is that including a table describing the overall capabilities of the FluxEngine toolbox would be useful to potential users who are not familiar with the tool. Listing the gases, air-sea flux parameterizations, most common adjustments (skin layer, constant temperature, etc) would help the reader to know whether it is worth their time and effort to learn to use the toolbox. As it is currently written the paper assumes readers have a baseline understanding of what is contained within the FluxEngine toolbox.

**We agree. A table describing the overall capabilities and commonly used options available would aid potential users. We have added this table into section 8 (Appendix C) of the manuscript and the table is highlighted within the introduction section of the paper on lines 219 to 220.**
